# Supplementary material for: Long-term groundwater recharge rates across India by in situ measurements
Source: Copernicus journal article supplement (doi:10.5194/hess-23-711-2019), 2019-02-07
Supplement: Supplementary file 1 [file hess-23-711-2019-supplement.pdf]

Supplement of Hydrol. Earth Syst. Sci., 23, 711–722, 2019  
<https://doi.org/10.5194/hess-23-711-2019-supplement>  
© Author(s) 2019. This work is distributed under  
the Creative Commons Attribution 4.0 License.

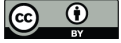

*Supplement of*

## **Long-term groundwater recharge rates across India by in situ measurements**

**Soumendra N. Bhanja et al.**

*Correspondence to:* Soumendra N. Bhanja ([soumendrabanja@gmail.com](mailto:soumendrabanja@gmail.com))  
and Abhijit Mukherjee ([amukh2@gmail.com](mailto:amukh2@gmail.com), [abhijit@gg.iitkgp.ernet.in](mailto:abhijit@gg.iitkgp.ernet.in))

The copyright of individual parts of the supplement might differ from the CC BY 4.0 License.

1 **Details of Tritium Injection approach:**

2 The tritiated water has been injected in the soil layer below root zone or the zero flux plane (0.6-  
3 0.8 m below ground level; Rangarajan and Athavale, 2000; Healy, 2010). After a rainfall event,  
4 the tritium containing layer moves downward due to infiltration. The vertical displacement of the  
5 injected tritium peak is directly proportional to the rate of water infiltration within the studied  
6 time period (Rangarajan et al., 2010).

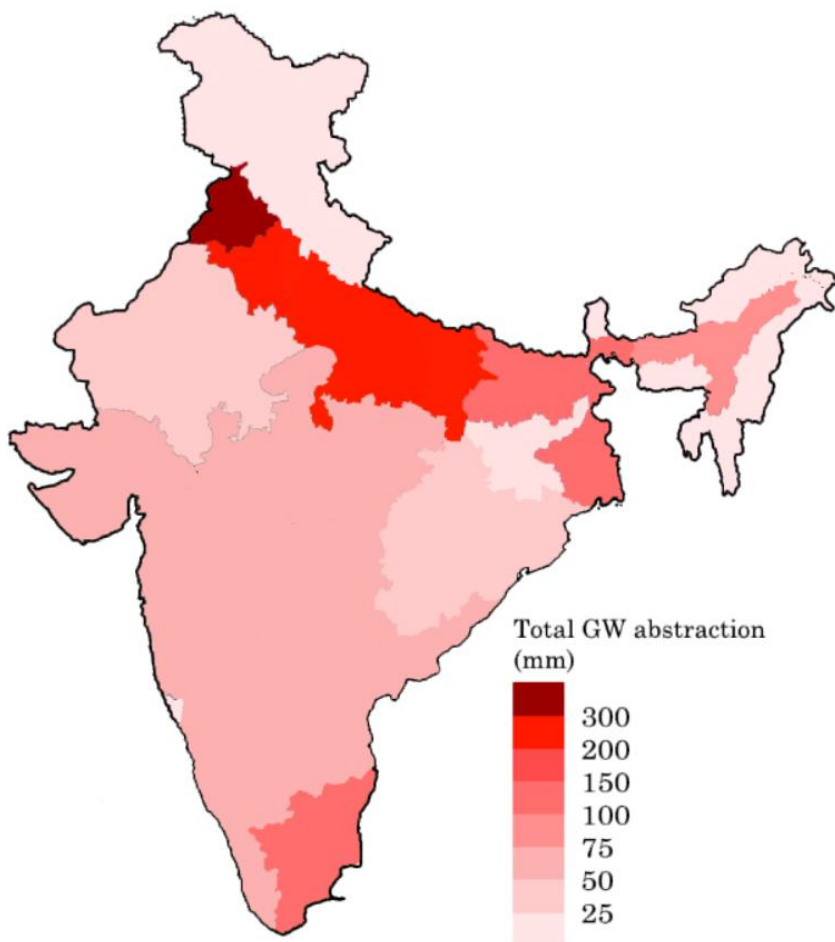

7

8 **Fig. S1:** Map showing state-wise total groundwater abstraction ( $10^{-6} \text{ km}^3$  per  $\text{km}^2$  of land area)  
9 for the year 2009 (CGWB, 2012a)

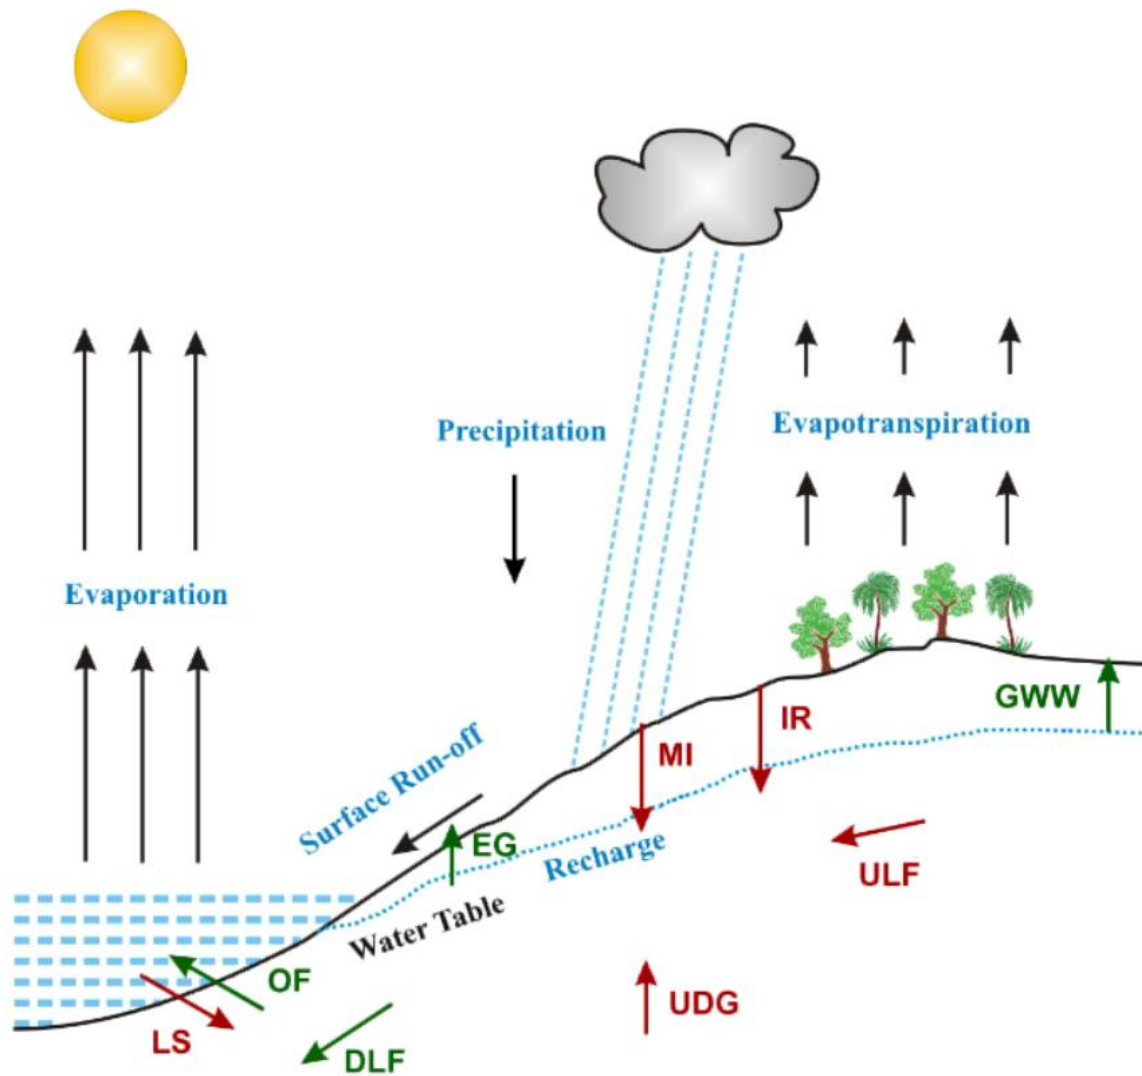

10

11 **Fig. S2:** Groundwater recharge processes. MI = Meteoric Inflow through precipitation; IR =  
 12 Irrigational return flow; LS = Lateral seepage from surface water; ULF = Flow from  
 13 upgradient location along flowpath; UDG = Upwelling from deeper groundwater systems;  
 14 OF = Outflow by baseflow and discharge; GWW = Groundwater withdrawal; DLF = Flow  
 15 toward down gradient along flow path; EG = Evaporation from groundwater
